# Supplementary material for: Danger-Associated Peptide Regulates Root Growth by Promoting Protons Extrusion in an AHA2-Dependent Manner in Arabidopsis
Source: PubMed Central journal article supplement (PMC7663391; doi:10.3390/ijms21217963), 2020-10-27
Supplement: ijms-21-07963-s001.pdf [file ijms-21-07963-s001.pdf]

## Supplementary data

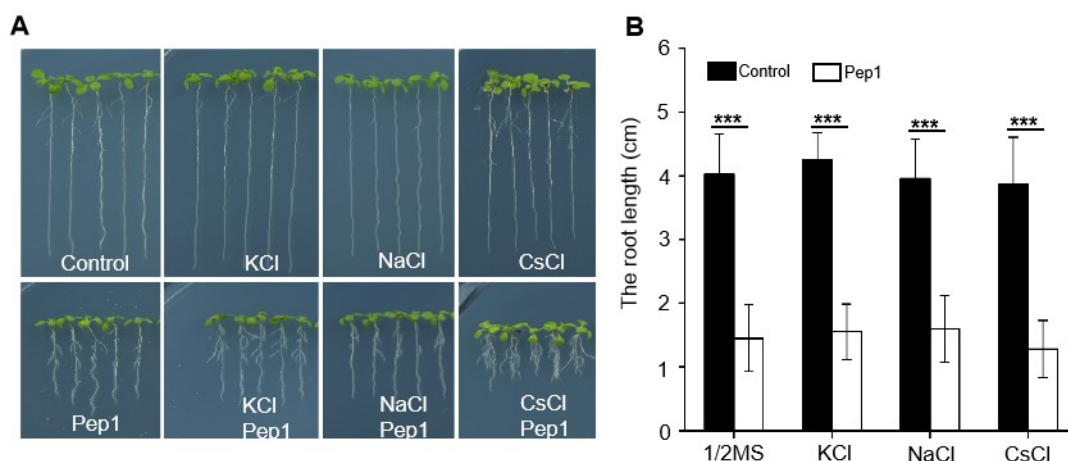

**Supplementary figure 1. Pep1 inhibits the root growth independent on  $K^+$ ,  $Na^+$  and  $Cs^+$  cations.**

(A) The growth phenotype of wild type (WT) root. Three-day-old seedlings were transferred onto half-strength MS medium supplemented with or without (Control) 50nM Pep1 in the presence or in the absence of 30mM KCl, 50mM NaCl or 2mM CsCl for 6 days. (B) The statistical analysis of the primary root length as indicated in (A). Data are means  $\pm$  SD from three replicate experiments (n=24 plants per treatment).

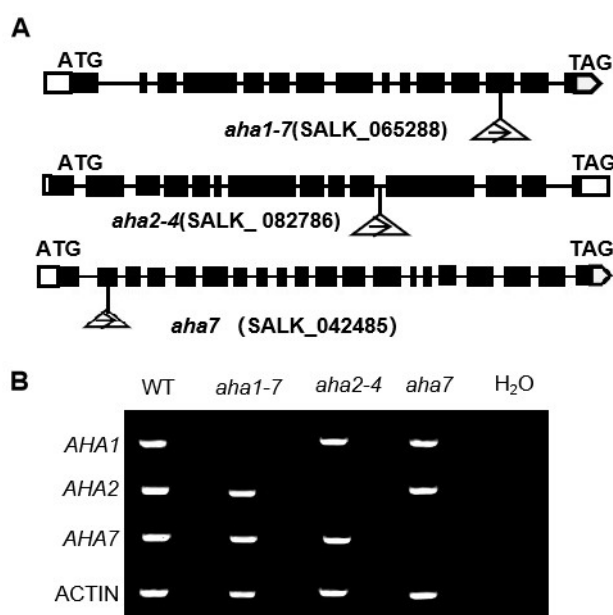

**Supplementary figure 2. The identification of *aha1-7*, *aha2-4* and *aha7* mutants.**

(A) Schematic map of T-DNA insertion locations of *aha1-7*, *aha2-4*, *aha7* mutants. Black boxes, lines and triangles represented exons, introns, and the position of the T-DNA insertion, respectively. The 5'- and 3'-UTRs are indicated by open boxes. ATG, translation start codon; TGA, stop codon. (B) RT-PCR detection of the transcriptional level of *AHA1*, *AHA2* and *AHA7* expression in wild type, *aha1-7*, *aha2-4*, and *aha7* mutants. Water was used as a negative control.

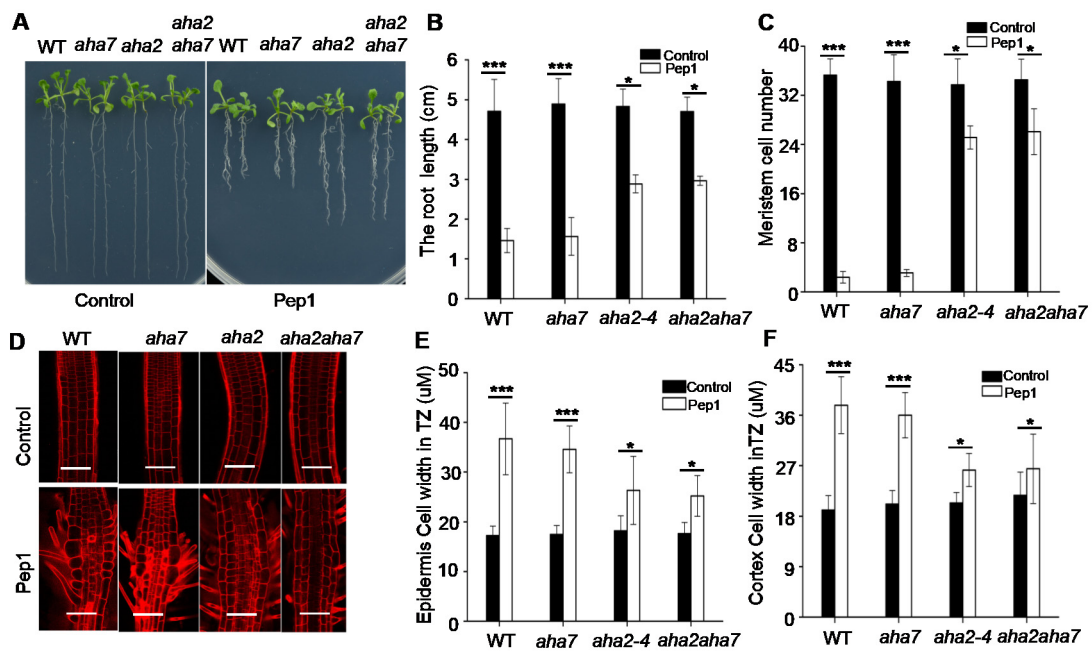

**Supplementary figure 3. AHA2 does not function redundant with AHA7 to regulate the Pep1 signaling in root.**

(A) The growth phenotype of wild type (WT), *aha7*, *aha2* and *aha2 aha7* roots. Three-day-old seedlings were transferred on half-strength MS agar medium supplemented with or without (Control) 50 nM Pep1 for 6 days. (B) The statistical analysis of the primary root length in WT, *aha7*, *aha2* and *aha2 aha7* plants as indicated (A). Data are means  $\pm$  SD from three independent experiments, (n=15). (C) Quantitative analysis of numbers of meristematic cortex cells as indicated in (A). Data are means  $\pm$  SD from three replicate experiments (n=24). (D) Longitudinal structures of roots in WT, *aha7*, *aha2* and *aha2 aha7* plants. 5-day-old seedlings were transferred on half-strength MS agar medium supplemented with or without (Control) 100nM Pep1 for 24h, the roots were stained with 5  $\mu$ M PI for 15s and photographed

under a confocal laser-scanning microscope. Similar results were obtained in three independent replicates. Bars=100um. **(E)** and **(F)** Quantitative analysis of epidermal and cortex cell width in TZ as indicated in **(D)**. Data are means  $\pm$ SD from three independent experiments (n = 32 cells from 8 roots per treatment). Asterisks in **(B)**, **(C)**, **(E)** and **(F)** indicate statistically significant differences (Tukey's test; \*, P<0.05, \*\*, P<0.01, \*\*\*, P<0.001).

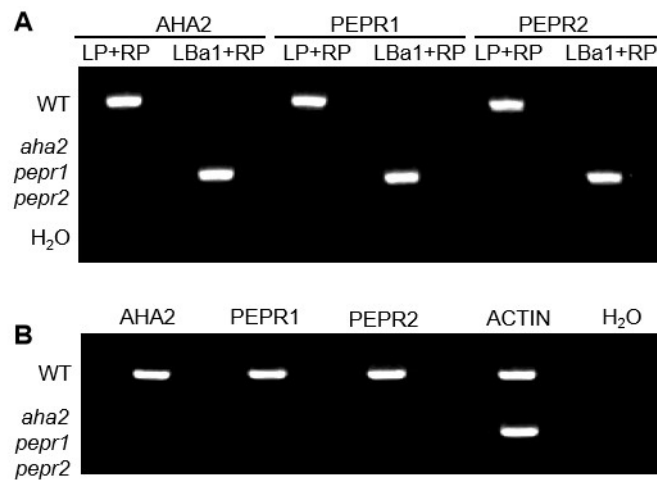

**Supplementary figure 4. The identification of *aha2 pepr1 pepr2* triple mutant.**

**(A)** Confirmation of the T-DNA insertion in the *aha2 pepr1 pepr2* triple mutant by PCR. **(B)** RT-PCR detection of *AHA1*, *AHA2* and *AHA7* expression in wild type and *aha2 pepr1 pepr2* triple mutant. Water was used as a negative control.

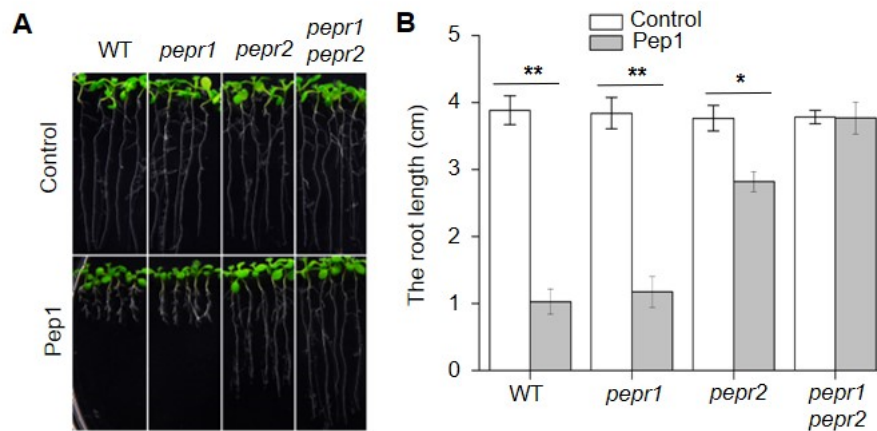

**Supplementary figure 5. PEPR2 primarily perceives the Pep1 signaling in roots.**

**(A)** The growth phenotype of wild type (WT), *pepr1*, *pepr2* and *pepr1 pepr2* roots.

Three-day-old seedlings were transferred on half-strength MS agar medium supplemented with or without (Control) 50 nM Pep1 for 6 days. **(B)** The statistical analysis of the primary root length in WT, *pepr1*, *pepr2* and *pepr1 pepr2* plants as indicated **(A)**. Data are means $\pm$ SD from three independent experiments, (n=15). Asterisks indicate statistically significant differences (Tukey's test; \*, P<0.05, \*\*, P<0.01).

**Supplementary Table 1** Primers used in this study

| Primer name                                                                   | Primer sequences (5'-3')         |
|-------------------------------------------------------------------------------|----------------------------------|
| <b>(1) qRT-PCR analyze</b>                                                    |                                  |
| <i>Actin2</i> -F                                                              | CTGTTCTCTCCTTGTACGCCAGT          |
| <i>Actin2</i> -R                                                              | CGGGTAATTCATAGTTCTTCTCGAT        |
| <i>AHA1</i> -F                                                                | TTGAAGTTTGCCATTCGGTA             |
| <i>AHA1</i> -R                                                                | GCCCATTGAGCTTCTCTTTC             |
| <i>AHA2</i> -F                                                                | TTGTTGAACGTCCTGGAGCA             |
| <i>AHA2</i> -R                                                                | AATTCCCAGTTGGCGTAAACC            |
| <i>AHA7</i> -F                                                                | AGAAATAGCGCAACGGAACT             |
| <i>AHA7</i> -R                                                                | TTGCAGCTGATTCAACCTTC             |
| <b>(2) BiFC analysis</b>                                                      |                                  |
| <i>AHA2</i> -BiFC-F                                                           | GACTAGTATGTCGAGTCTCGAAGATATCAAG  |
| <i>AHA2</i> -BiFC-R                                                           | CGGGATCCCACAGTGTAG TGACTGGGAGT   |
| <i>PEPR2</i> -BiFC-F                                                          | GACTAGTATGAGGAATC TTGGGTTACT CGA |
| <i>PEPR2</i> -BiFC-R                                                          | CCCCCGGGTGAAGTGA CCCGAAGTGC      |
| <b>(3) Yeast two-hybrid analysis</b>                                          |                                  |
| <i>PEPR2</i> -F                                                               | GGAATTCCCGGTGCAAAAGAGAACCAAC     |
| <i>PEPR2</i> -R                                                               | CGGGATCCAAATCTTTCACCACATCTCTCATC |
| <i>AHA2</i> -F                                                                | GGAATTCTTCAAGTTTGCCATTCGATACAT   |
| <i>AHA2</i> -R                                                                | CGGGATCCCACATGTAGTGACTGGGAGTTTCA |
| <b>(4) Identification of <i>aha1-7</i>, <i>aha2-4</i>, <i>aha7</i> mutant</b> |                                  |
| LBa1                                                                          | TGGTTCACGTAGTGGGCCATCG           |
| <i>aha1-7</i> -LP                                                             | ATGTCAGGTC TCGAAGATAT            |
| <i>aha1-7</i> -RP                                                             | CTACACAGTG TAGTGATGTC            |
| <i>aha2-4</i> -LP                                                             | ACCTCTGGCTCAAAATTGTCC            |
| <i>aha2-4</i> -RP                                                             | CTCCAGGACGTTCAACAAAAG            |
| <i>aha7</i> -LP                                                               | ATGACGGACATAGAAGCTCTC            |
| <i>aha7</i> -RP                                                               | TTCGCTTTAG GGGCTAACTG            |
| <i>pepr1</i> -LP                                                              | ACATCAGACGGACGTAAAACG            |
| <i>pepr1</i> -RP                                                              | TGCAATTAGGTGATCCGAAAC            |
| <i>pepr2</i> -LP                                                              | TCCAATGTGAGGCTCCATATC            |
| <i>pepr2</i> -RP                                                              | TTCTCAAAACAAACTCACGGG            |
